# Supplementary material for: Hippo signaling promotes Ets21c-dependent apical cell extrusion in the Drosophila wing disc
Source: Oxford University Press journal article supplement (doi:10.1242/dev.190124), 2020-01-01
Supplement: dev190124supp.pdf [file dev190124supp.pdf]

## Supplementary materials

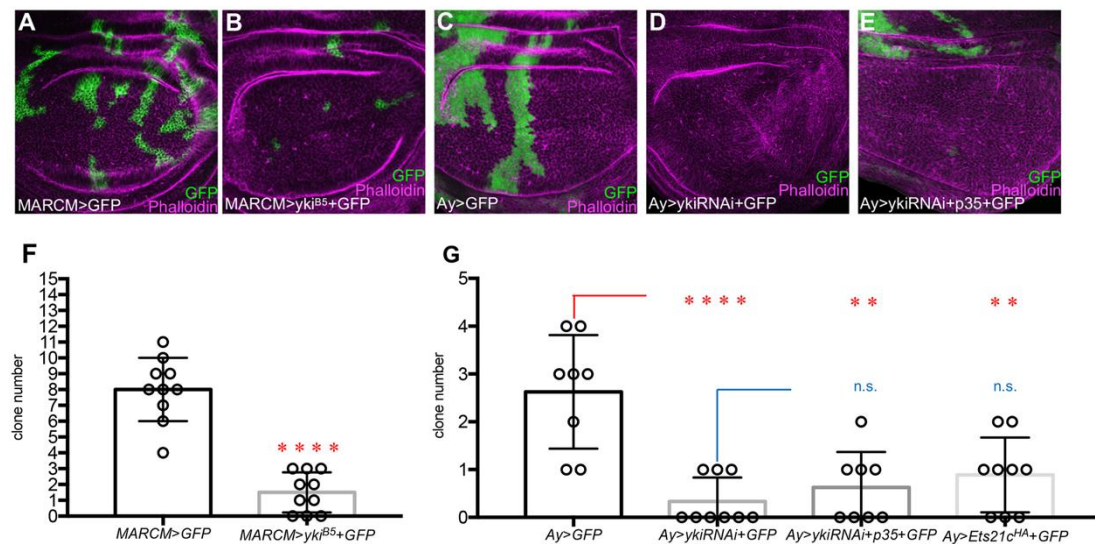

**Figure S1. Lack of *yki* induced small and rare clones in the wing discs**

(A) *GFP*-marked MARCM control clones in the *Drosophila* wing disc ( $n=$ ). (B) *yki*<sup>B5</sup> mutant clones were small and rare ( $n=$ ). (C) *GFP* expressing clones ( $n=$ ). (D) *ykiRNAi* clones were very rarely observed in the wing disc pouch ( $n=$ ). (E) *ykiRNAi* and *p35* co-expressing clones were still rare and small ( $n=$ ). (F and G) Quantification of clone numbers in A–E and Fig 5A. Data are presented as mean + SD. P values were calculated using two-tailed Student's *t* tests. \*\* $p < 0.01$ ; \*\*\*\* $p < 0.0001$ ; n.s., no significant difference.

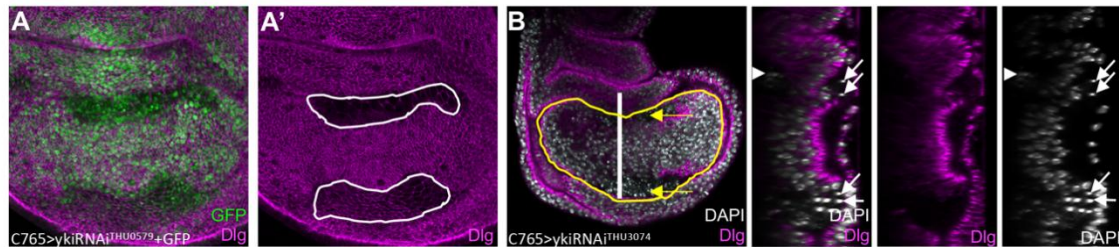

**Figure S2. Apical extrusion of cells occurred intensively in two stripe regions close to the wing hinge**

(A and A') x-y views close to the apical section of the wing disc showed two stripe regions with reduced Dlg staining. (B) Knocking-down *yki* in another independent *ykiRNAi* line (*UAS-ykiRNAi<sup>THU3074</sup>*) induced the same apical cell extrusion (arrows) and basal cell extrusion (arrowhead) phenotypes in the wing epithelia. ACE occurred (arrows) in the pouch of the wing disc (yellow circle). *UAS-ykiRNAi<sup>THU0579</sup>* and *UAS-ykiRNAi<sup>THU3074</sup>* were constructed using two different vectors: VALIUM20 and VALIUM10. Furthermore, the RNAi target sequences in these two lines differ.

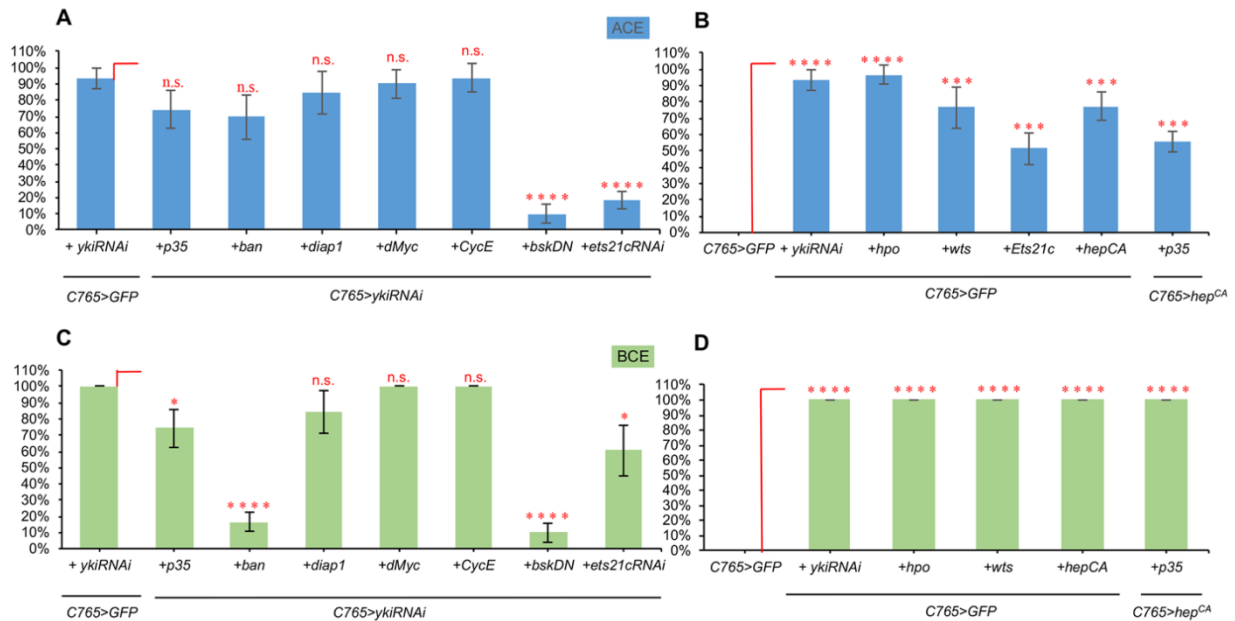

### Figure S3. The percentage of wing discs with ACE and BCE

We used C765-Gal4 to drive gene expression. (A) Percentage of wing discs with ACE: *ykiRNAi+GFP* (93.3%, n=30) (n refer to average wing disc number of three replications), *ykiRNAi+p35* (74.2%, n=31), *ykiRNAi+ban* (70%, n=30), *ykiRNAi+diap1* (84.4%, n=32), *ykiRNAi+dMyc* (90%, n=30), *ykiRNAi+CycE* (93.8%, n=32), *ykiRNAi+bsk<sup>DN</sup>* (10%, n=30), and *ykiRNAi+Ets21cRNAi* (18.2%, n=33). (B) Percentage of wing discs with ACE: *GFP* (0%, n=28), *hpo+GFP* (96.8%, n=31), *wts+GFP* (76.5%, n=34), *Ets21c+GFP* (51.5%, n=33), *hep<sup>CA</sup>+GFP* (77.4%, n=31), and *hep<sup>CA</sup>+p35* (55.6%, n=36). (C) Percentage of wing discs with BCE (the wing discs used for this analysis are the same as those used in Fig. s3. A): *ykiRNAi+GFP* (100%, n=30), *ykiRNAi+p35* (74.2%, n=31), *ykiRNAi+ban* (16.7%, n=30), *ykiRNAi+diap1* (84.4%, n=32), *ykiRNAi+dMyc* (100%, n=30), *ykiRNAi+CycE* (100%, n=32), *ykiRNAi+bsk<sup>DN</sup>* (10%, n=30) and *ykiRNAi+Ets21cRNAi* (60.6%, n=33). (D) Percentage of wing discs with BCE (the wing discs used for this analysis are the same as those used in Fig. s3. B): *GFP* (0%, n=28), *hpo+GFP* (100%, n=31), *wts+GFP* (100%, n=34), *hep<sup>CA</sup>+GFP* (100%, n=31), and *hep<sup>CA</sup>+p35* (100%, n=36). Results are shown as mean + SD. P values were calculated using two-tailed Student's t-test. \*p < 0.05; \*\*p < 0.01; \*\*\*p < 0.001; \*\*\*\*p < 0.0001; n.s., no significant difference.

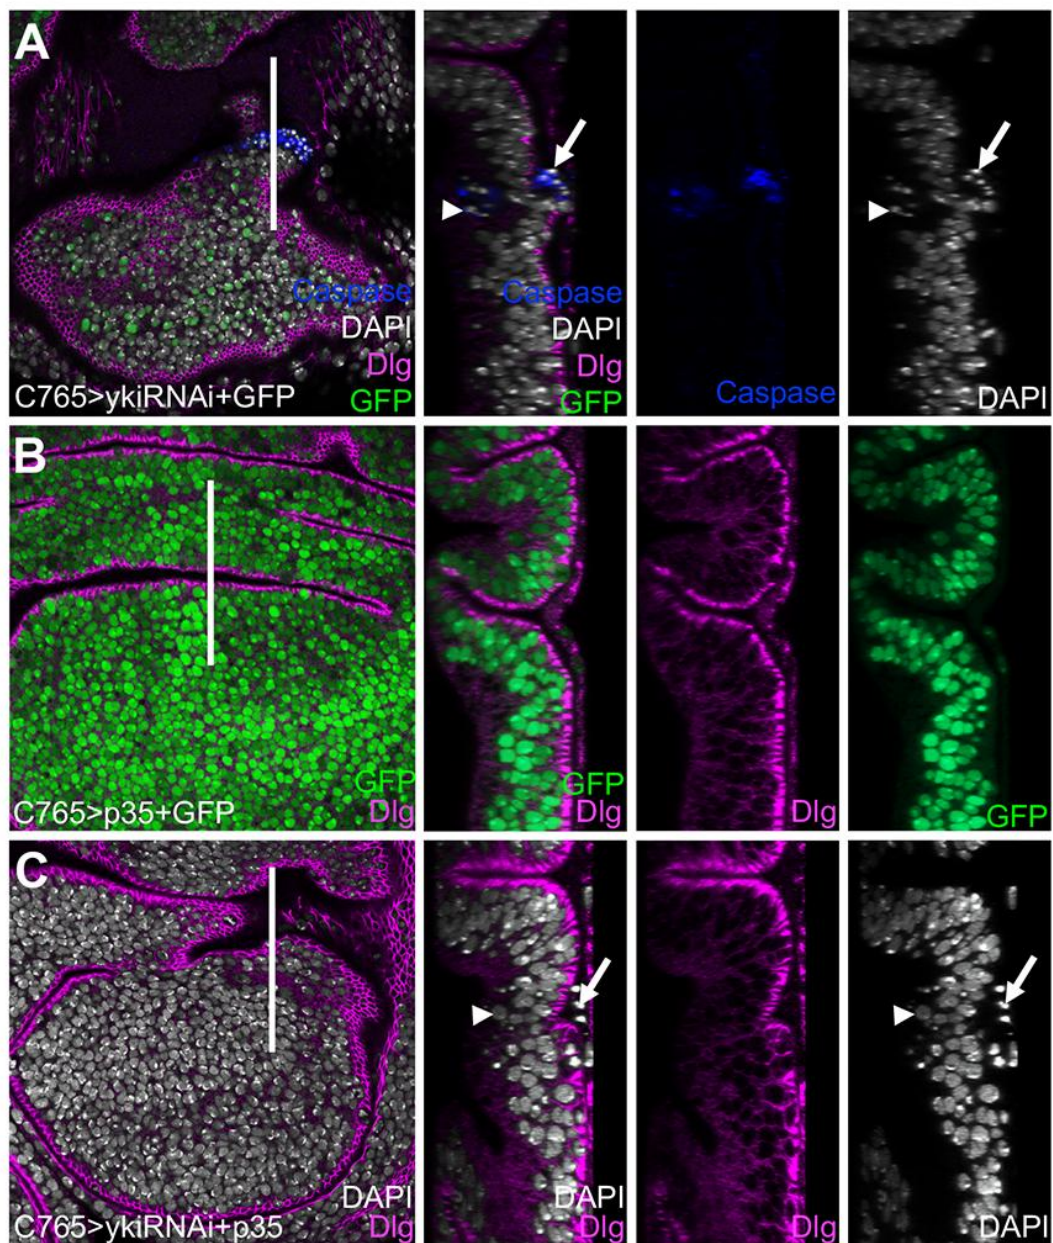

**Figure S4. Suppressing apoptosis did not block *ykiRNAi* induced cell extrusion**

(A) *ykiRNAi* induced cell extrusion and cleaved caspase-3 staining. (B) Control experiment, *p35* expression. (C) Co-expressing *p35* and *ykiRNAi* did not repress *ykiRNAi*-induced cell extrusion.



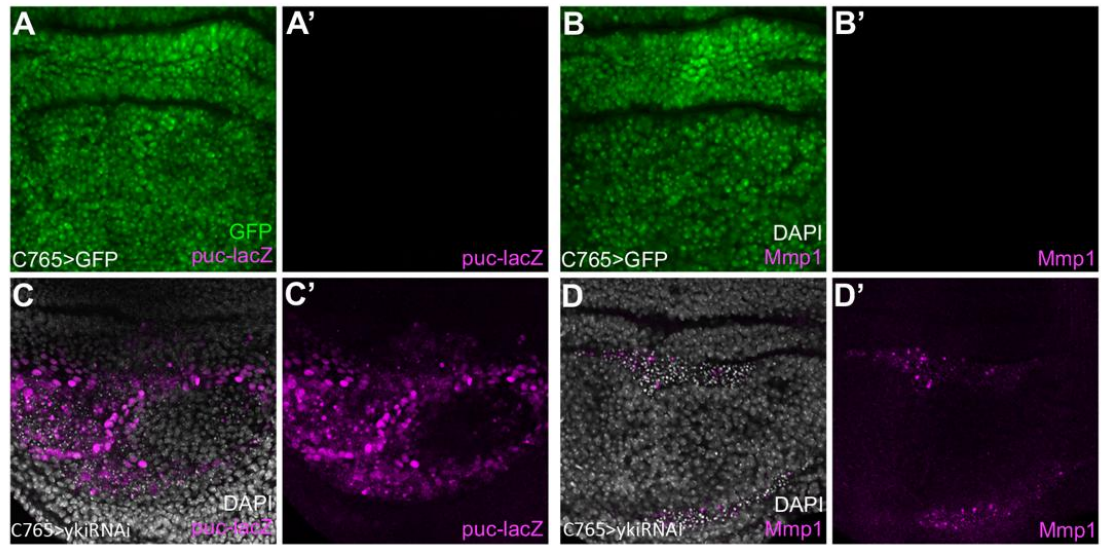

**Figure S5. JNK signaling was activated in *ykiRNAi* expressing wing discs**

*puc* (A') and *Mmp1* (B') were not expressed in control wing discs. (C and C') *puc* expression was activated in *ykiRNAi* expressing wing discs. (D, D') *Mmp1* expression was activated in *ykiRNAi* expressing wing discs.

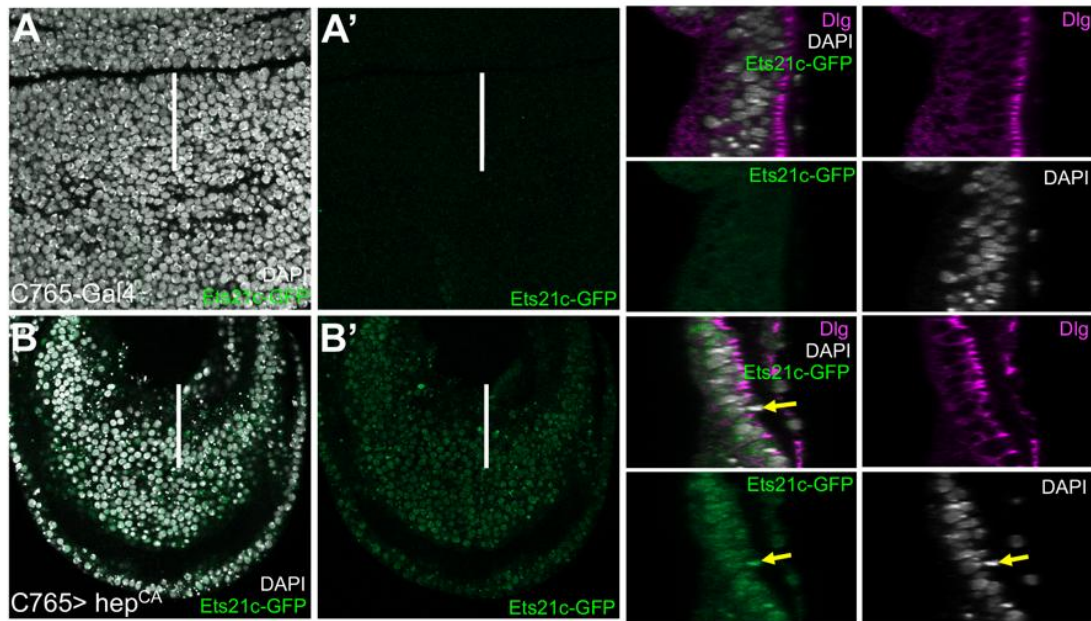

**Figure S6. Ets21c-GFP level was increased when JNK signaling was activated**

(A, A') *Ets21c-GFP* level is low in control wing discs. (B, B') Expression of *hep<sup>CA</sup>* increased wing disc *Ets21c-GFP* levels including in the apically extruded cells (yellow arrow).

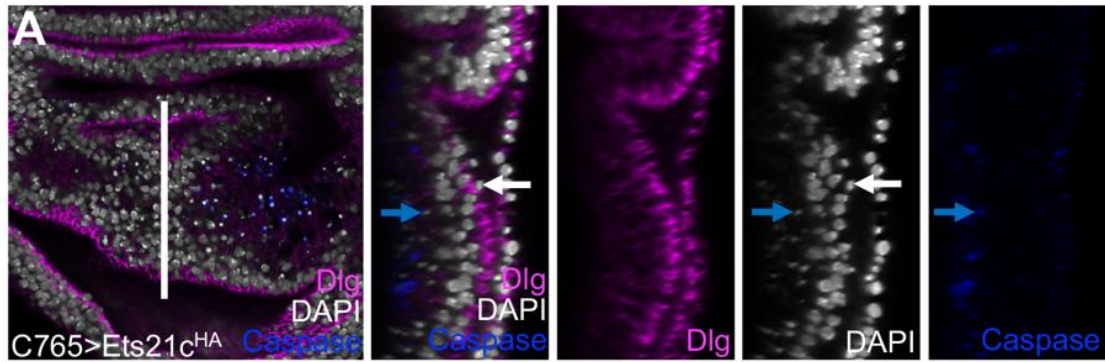

**Figure S7. *Ets21c*-induced apical extruded cells were not undergoing apoptosis**

(A) An x-y scan close to the basal section of the wing discs. Expression of *Ets21c<sup>CA</sup>* induced apically extruded cells (arrow) with no cleaved caspase-3 staining. Most cleaved caspase-3 staining (blue arrow) was located on the basal side of the wing discs.

**Table S1. Abundance of transcription of third instar larvae**

[Click here to Download Table S1](#)

**Table S2. Alterations in mRNA expression of 6 genes involved in Hpo pathway**

| genes         | Control     | C765>ykiRNAi | fold change | regulated |
|---------------|-------------|--------------|-------------|-----------|
| <i>Act57B</i> | 17.06863333 | 30.011       | 1.591692872 | up        |
| <i>Act87E</i> | 10.60510521 | 20.50697756  | 1.84484084  | up        |
| <i>wgn</i>    | 30.09160511 | 23.09001711  | 0.791146608 | down      |
| <i>hth</i>    | 13.89972479 | 8.764950015  | 0.710459822 | down      |
| <i>ex</i>     | 68.42301728 | 34.85187972  | 0.555330751 | down      |
| <i>yki</i>    | 67.43286075 | 18.55718096  | 0.304498467 | down      |

**Table S3. Selected genes subjected to quantitative RT-PCR**

| genes         | Control     | C765>ykiRNAi | fold change | regulated |
|---------------|-------------|--------------|-------------|-----------|
| <i>hth</i>    | 13.89972479 | 8.764950015  | 0.710459822 | down      |
| <i>kmn1</i>   | 63.83590667 | 26.65354333  | 0.427832717 | down      |
| <i>puc</i>    | 8.850264407 | 13.10390111  | 1.405928444 | up        |
| <i>rpr</i>    | 7.154933333 | 12.48833333  | 1.551257881 | up        |
| <i>yki</i>    | 67.43286075 | 18.55718096  | 0.304498467 | down      |
| <i>Ets21c</i> | 0.436940337 | 1.458076081  | 2.026518117 | up        |



**Table S4. Primer sequences used for quantitative RT-PCR**

|                  |                              |
|------------------|------------------------------|
| <i>hth</i> -F    | 5'-CAAACCACCGGAGTTGGGAT-3'   |
| <i>hth</i> -R    | 5'-AGGGGGTACTCACAACGTCT-3'   |
| <i>kmn1</i> -F   | 5'-CCGCAGTGACGTACTGGAAT-3'   |
| <i>kmn1</i> -R   | 5'-GTGCTTGCTTCATAGCGACG-3'   |
| <i>puc</i> -F    | 5'-TTTCTGCTGACTTGCCACAC-3'   |
| <i>puc</i> -R    | 5'-ATCCTCTCACACACTCGCTT-3'   |
| <i>rpr</i> -F    | 5'-CGGGAGTCACAGTGGAGATT-3'   |
| <i>rpr</i> -R    | 5'-TTTGGGTTTTGGGTTGGCTC-3'   |
| <i>yki</i> -F    | 5'-GAGCAGGCAGTTACCGAGTC-3'   |
| <i>yki</i> -R    | 5'-ACGCTAAGCCCAGATTGCAT-3'   |
| <i>Ets21c</i> -F | 5'-GTGCCAACAGAGGCCGATTA-3'   |
| <i>Ets21c</i> -R | 5'-CTGTTGGTGGGAACCTCCGT-3'   |
| <i>Actin</i> -F  | 5'-CAGAGCAAGCGTGGTATCCT-3'   |
| <i>Actin</i> -R  | 5'-CTCATTGTAGAAGGTGTGGTGC-3' |

**Table S5. Detailed genotypes for each figure**

[Click here to Download Table S5](#)
